# Supplementary material for: Ligand-free supermolecules: [Pd2@Ge18]4− and [Pd2@Sn18]4− as multiple-bonded Zintl-ion clusters based on Pd@Ge9 and Pd@Sn9 assembled units
Source: Royal Society of Chemistry journal article supplement (doi:10.1039/d4nr00220b), 2024-01-01
Supplement: d4nr00220b1.pdf [file d4nr00220b1.pdf]

Supporting Information for:

# Ligand-Free Supermolecules. $[\text{Pd}_2@\text{Ge}_{18}]^{4-}$ and $[\text{Pd}_2@\text{Sn}_{18}]^{4-}$ as Single Bonded Zintl-Ions Cluster Based on $\text{Pd}@\text{Ge}_9$ and $\text{Pd}@\text{Sn}_9$ Assembled Units

Peter L. Rodríguez-Kessler<sup>a</sup> and Alvaro Muñoz-Castro<sup>b\*</sup>

<sup>a</sup>*Centro de Investigaciones en Óptica A.C., Loma del Bosque 115, Col. Lomas del Campestre, León, Guanajuato, 37150, Mexico.*

<sup>b</sup>*Facultad de Ingeniería, Arquitectura y Diseño, Universidad San Sebastián, Bellavista 7, Santiago, 8420524, Chile.*

## Content

**Figure S1.** Isosurface for superatomic shells of *clos*<sub>o</sub>- $[\text{Pd}@\text{Sn}_{12}]^{2-}$  accounting for the 50 cage and 10 4d-Pd electrons, given by  $1\text{S}^21\text{P}^61\text{D}^{10}1\text{F}^{14}(4\text{d-Pd})^{10}2\text{S}^22\text{P}^61\text{G}^{10}$  shell structure. **Page 2**

**Figure S2.** Isosurface for superatomic shells of the  $[\text{Pd}@\text{Sn}_9]^{2-}$  unit at the structure given by the overall  $[\text{Pd}_2@\text{Sn}_{18}]^{4-}$  cluster. **Page 2**

**Figure S3.** Isosurface for the bonding or in-phase (+) combinations, and, antibonding or out-of phase combinations (-) between the two  $[\text{Pd}@\text{Sn}_9]^{2-}$  motifs within the  $[\text{Pd}_2@\text{Sn}_{18}]^{4-}$  oblate cluster. **Page 3**

**Table S1.** Energy decomposition analysis (EDA) for  $\text{Pd}/[\text{Pd}@\text{E}_{18}]^{4-}$  and  $\text{Pd}/[@\text{E}_{12}]^{2-}$  interaction, denoting the individual contribution from relevant deformation density channels. **Page 4**

**Figure S4.** Isosurface for the individual deformation densities ( $\Delta\rho_n$ ) related to the interaction between  $[\text{Pd}@\text{Ge}_9]^{2-}/[\text{Pd}@\text{Ge}_9]^{2-}$  (a),  $[\text{Pd}@\text{Sn}_9]^{2-}/[\text{Pd}@\text{Sn}_9]^{2-}$  (b),  $\text{Pd}/[\text{Pd}@\text{Ge}_{18}]^{4-}$  (c),  $\text{Pd}/[\text{Pd}@\text{Sn}_{18}]^{4-}$  (d),  $\text{Pd}/[\text{Ge}_{12}]^{2-}$  (e),  $\text{Pd}/[\text{Sn}_{12}]^{2-}$  (e). **Page 5**

**Figure S5.** Contour-plot representation for magnetic response properties under different orientations of the external field ( $B_z^{\text{ind}}$ ,  $B_x^{\text{ind}}$ , and  $B_y^{\text{ind}}$ ) and their isotropic (averaged) term (NICS), for:  $[\text{Pd}@\text{Ge}_{12}]^{2-}$  (a),  $[\text{Pd}_2@\text{Ge}_{18}]^{4-}$  (b),  $[\text{Pd}@\text{Sn}_{12}]^{2-}$  (c),  $[\text{Pd}_2@\text{Sn}_{18}]^{4-}$  (d). **Page 6**

**Table S2.** Energy decomposition analysis (EDA) at the hybrid TZ2P/PBE0 level of theory for  $[\text{Pd}@\text{E}_9]^{2-}/[\text{Pd}@\text{E}_9]^{2-}$  interaction from homolytic fragmentation ( $^7[\text{Pd}@\text{E}_9]^{2-}/^7[\text{Pd}@\text{E}_9]^{2-}$ ), denoting the individual contribution from relevant deformation density channels. **Page 7**

**Table S3.** Energy decomposition analysis (EDA) at the at the hybrid TZ2P/PBE0 level of theory for  $\text{Pd}/[\text{Pd}@\text{E}_{18}]^{4-}$  and  $\text{Pd}/[@\text{E}_{12}]^{2-}$  interaction, denoting the individual contribution from relevant deformation density channels. **Page 8**

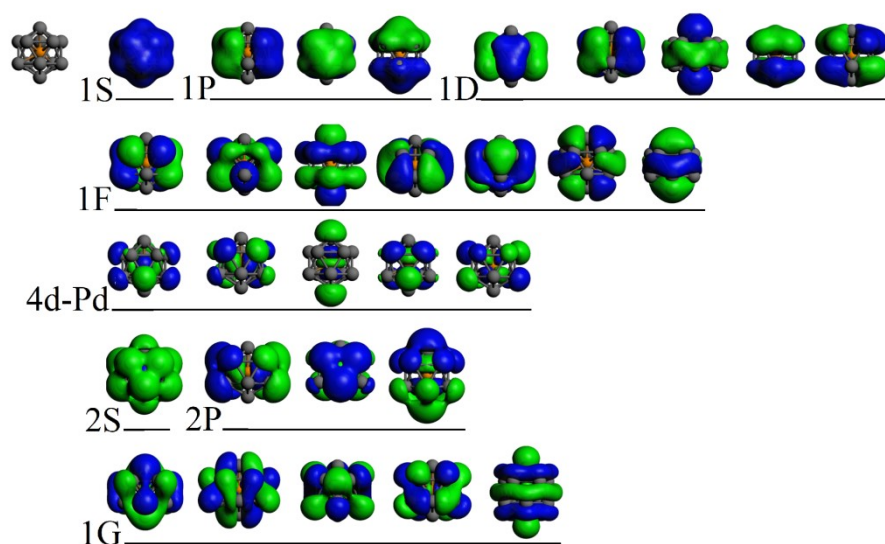

Figure S1. Isosurface for superatomic shells of *closo*-[Pd@Sn<sub>12</sub>]<sup>2-</sup> accounting for the 50 cage and 10 4d-Pd electrons, given by 1S<sup>2</sup>1P<sup>6</sup>1D<sup>10</sup>1F<sup>14</sup>(4d-Pd)<sup>10</sup>2S<sup>2</sup>2P<sup>6</sup>1G<sup>10</sup> shell structure.

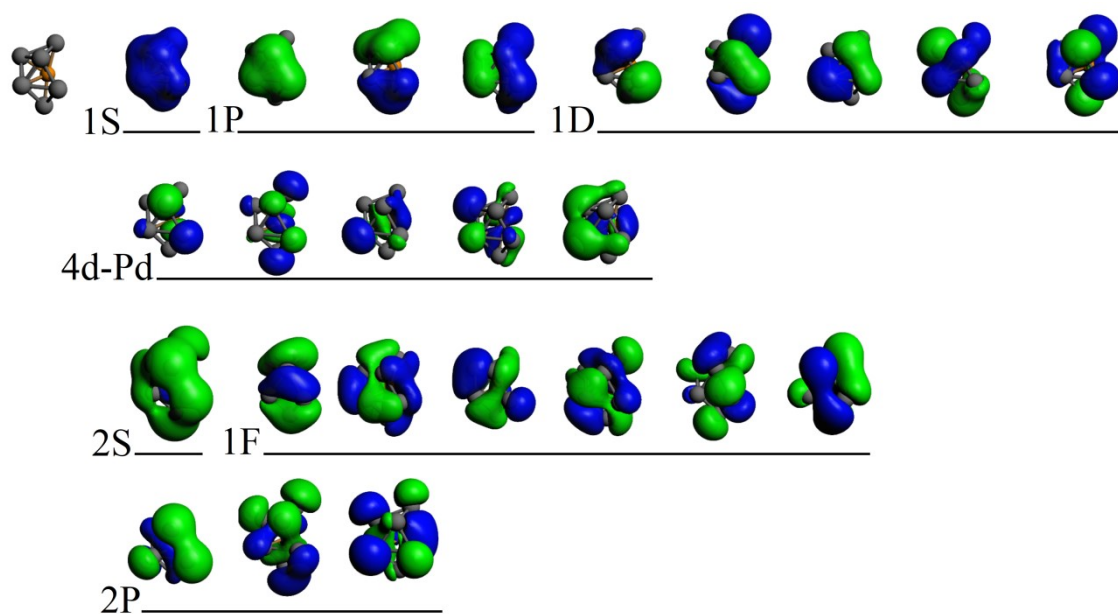

Figure S2. Isosurface for superatomic shells of the [Pd@Sn<sub>9</sub>]<sup>2-</sup> unit at the structure given by the overall [Pd<sub>2</sub>@Sn<sub>18</sub>]<sup>4-</sup> cluster.

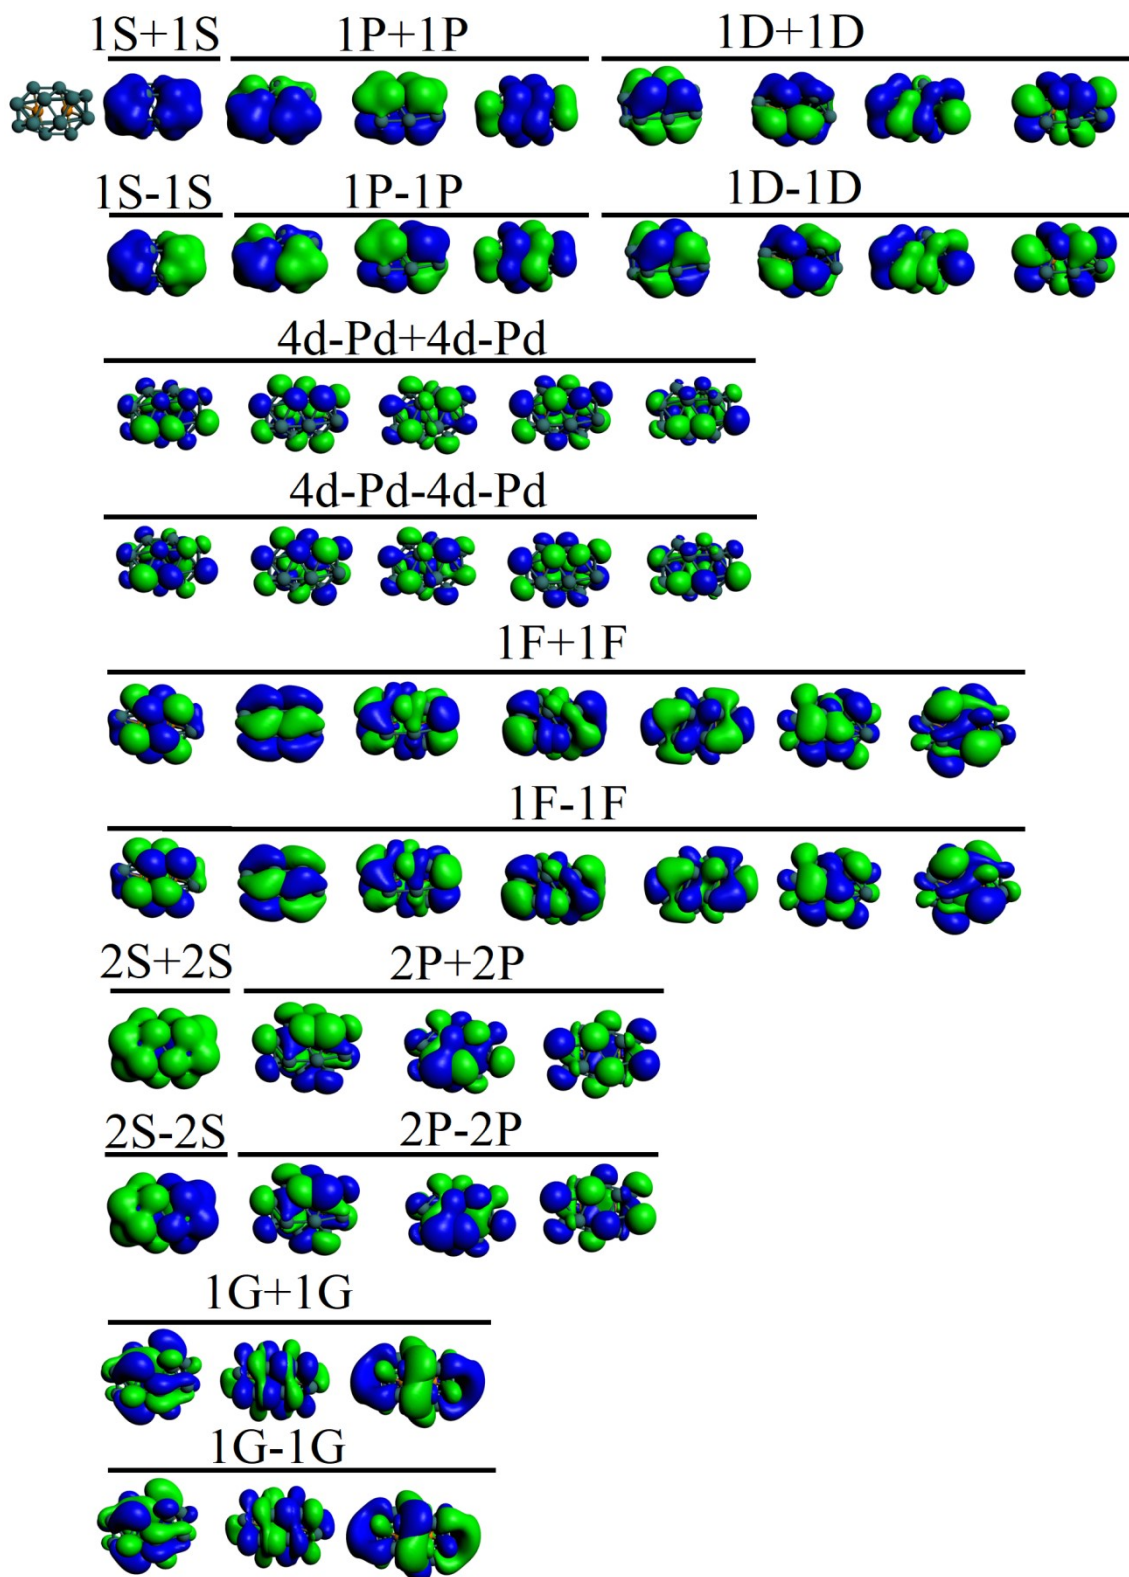

Figure S3. Isosurface for the bonding or in-phase (+) combinations, and, antibonding or out-of phase combinations (-) between the two  $[\text{Pd}@\text{Sn}_9]^{2-}$  motifs within the  $[\text{Pd}_2@\text{Sn}_{18}]^{4+}$  oblate cluster.

Table S1. Energy decomposition analysis (EDA) for Pd/[Pd@E<sub>18</sub>]<sup>4-</sup> and Pd/[@E<sub>12</sub>]<sup>2-</sup> interaction, denoting the individual contribution from relevant deformation density channels. Values in kcal/mol.

|                                        | E=Ge   |       | E=Sn   |       |
|----------------------------------------|--------|-------|--------|-------|
| Pd/[Pd@E <sub>18</sub> ] <sup>4-</sup> |        |       |        |       |
| $\Delta E_{\text{Pauli}}$              | 334.9  |       | 278.3  |       |
| $\Delta E_{\text{elestat}}$            | -307.6 | 68.0% | -277.8 | 70.2% |
| $\Delta E_{\text{orb}}$                | -137.8 | 30.5% | -109.8 | 27.7% |
| $\Delta E_{\text{disp}}$               | -6.8   | 1.5%  | -8.2   | 2.1%  |
|                                        |        |       |        |       |
| $\Delta E_{\text{int}}$                | -117.3 |       | -117.6 |       |
|                                        |        |       |        |       |
| $\Delta \rho_1$                        | -31.7  | 23.0% | -23.9  | 21.8% |
| $\Delta \rho_2$                        | -31.7  | 23.0% | -23.9  | 21.8% |
| $\Delta \rho_3$                        | -23.4  | 17.0% | -12.0  | 10.9% |
| $\Delta \rho_4$                        | -18.0  | 13.1% | -14.0  | 12.8% |
| $\Delta \rho_5$                        | -18.0  | 13.1% | -12.7  | 11.6% |
| $\Delta \rho_6$                        | -7.2   | 5.2%  | -12.7  | 11.6% |
| Endo                                   |        |       |        |       |
| Pd/[E <sub>12</sub> ] <sup>2-</sup>    |        |       |        |       |
| $\Delta E_{\text{Pauli}}$              | 424.1  |       | 303.7  |       |
| $\Delta E_{\text{elestat}}$            | -369.5 | 69.5% | -293.1 | 69.5% |
| $\Delta E_{\text{orb}}$                | -157.6 | 29.7% | -122.7 | 29.1% |
| $\Delta E_{\text{disp}}$               | -4.3   | 0.8%  | -6.1   | 1.4%  |
|                                        |        |       |        |       |
| $\Delta E_{\text{int}}$                | -107.3 |       | -118.1 |       |
|                                        |        |       |        |       |
| $\Delta \rho_1$                        | -32.6  | 20.7% | -21.4  | 17.5% |
| $\Delta \rho_2$                        | -29.8  | 18.9% | -19.6  | 16.0% |
| $\Delta \rho_3$                        | -29.8  | 18.9% | -19.6  | 16.0% |
| $\Delta \rho_4$                        | -27.5  | 17.5% | -18.3  | 14.9% |
| $\Delta \rho_5$                        | -27.5  | 17.5% | -18.3  | 14.9% |
| $\Delta \rho_6$                        | -5.0   | 3.2%  | -15.0  | 12.2% |

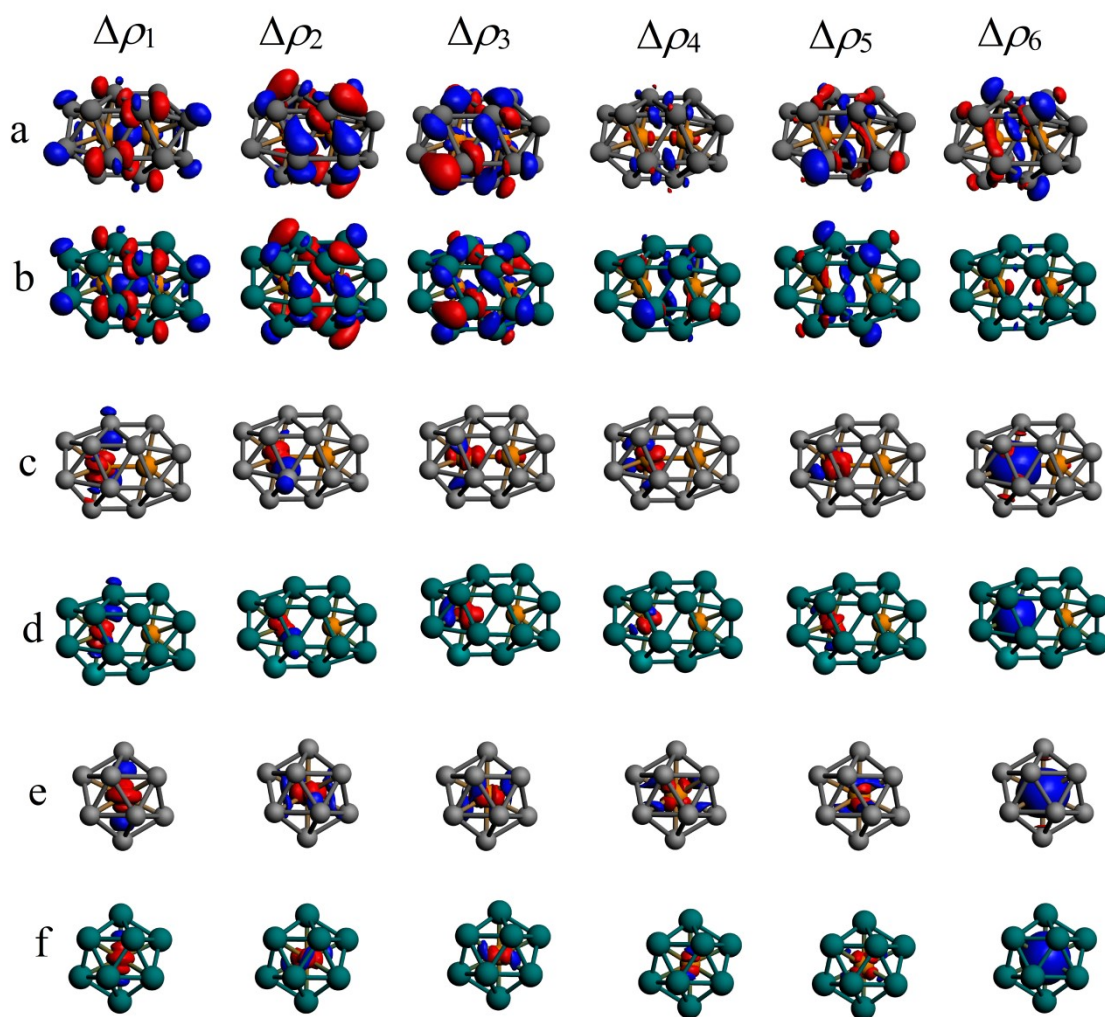

Figure S4. Isosurface for the individual deformation densities ( $\Delta\rho_n$ ) related to the interaction between  $[\text{Pd}@\text{Ge}_9]^{2-}/[\text{Pd}@\text{Ge}_9]^{2-}$  (a),  $[\text{Pd}@\text{Sn}_9]^{2-}/[\text{Pd}@\text{Sn}_9]^{2-}$  (b),  $\text{Pd}/[\text{Pd}@\text{Ge}_{18}]^{4-}$  (c),  $\text{Pd}/[\text{Pd}@\text{Sn}_{18}]^{4-}$  (d),  $\text{Pd}/[\text{Ge}_{12}]^{2-}$  (e),  $\text{Pd}/[\text{Sn}_{12}]^{2-}$  (e).

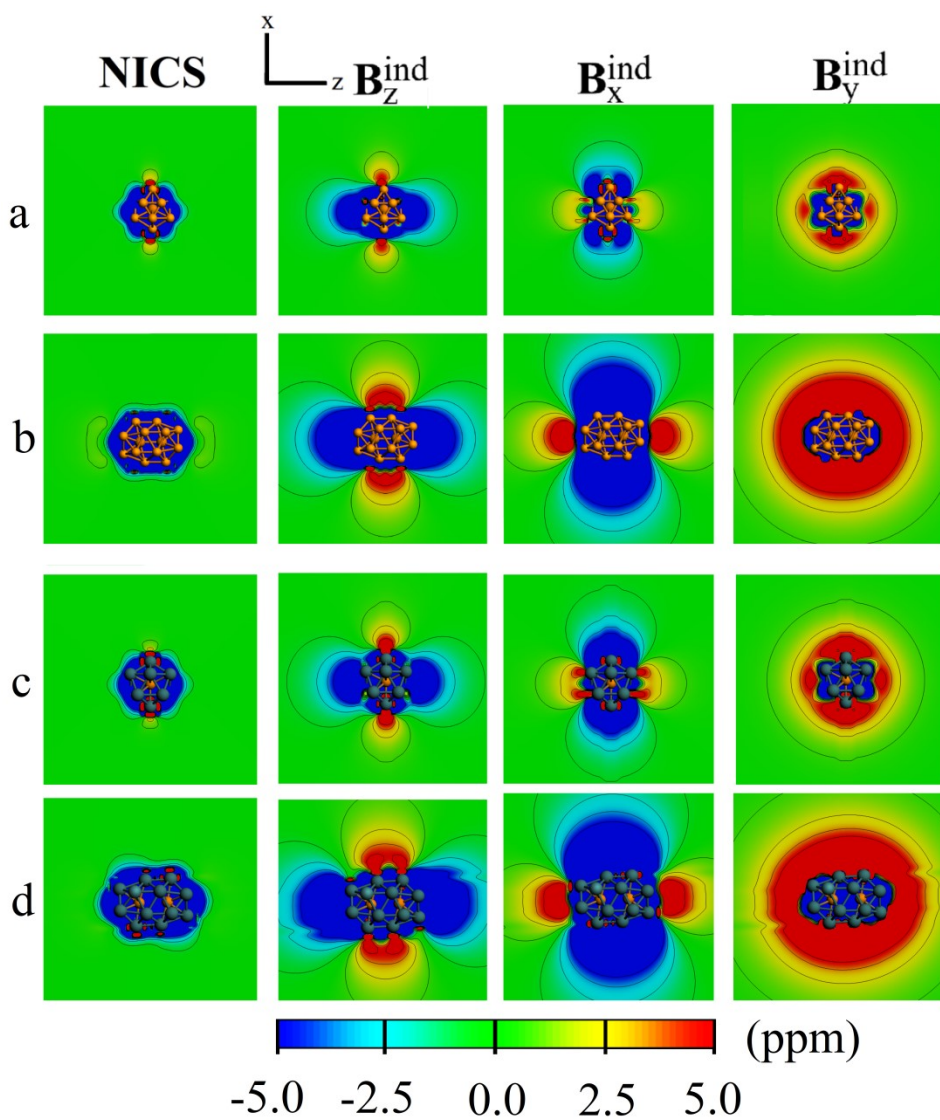

Figure S5. Contour-plot representation for magnetic response properties under different orientations of the external field ( $B_z^{\text{ind}}$ ,  $B_x^{\text{ind}}$ , and  $B_y^{\text{ind}}$ ) and their isotropic (averaged) term (NICS), for:  $[\text{Pd}@\text{Ge}_{12}]^{2-}$  (a),  $[\text{Pd}_2@\text{Ge}_{18}]^{4-}$  (b),  $[\text{Pd}@\text{Sn}_{12}]^{2-}$  (c),  $[\text{Pd}_2@\text{Sn}_{18}]^{4-}$  (d). Color bar between -5.0 to 5.0 ppm, positive values means shielding; negative values means deshielding.

Table S2. Energy decomposition analysis (EDA) at the hybrid TZ2P/PBE0 level of theory for  $[\text{Pd}@\text{E}_9]^{2-}/[\text{Pd}@\text{E}_9]^{2-}$  interaction from homolytic fragmentation ( $^5[\text{Pd}@\text{E}_9]^{2-}/^5[\text{Pd}@\text{E}_9]^{2-}$ ), denoting the individual contribution from relevant deformation density channels. Values in kcal/mol.

|                             | $[\text{Pd}_2@\text{Ge}_{18}]^{4-}$ |       | $[\text{Pd}_2@\text{Sn}_{18}]^{4-}$ |       |
|-----------------------------|-------------------------------------|-------|-------------------------------------|-------|
| $\Delta E_{\text{Pauli}}$   | 512.1                               |       | 481.1                               |       |
| $\Delta E_{\text{elestat}}$ | -176.3                              | 21.3% | -176.1                              | 24.6% |
| $\Delta E_{\text{orb}}$     | -629.8                              | 76.2% | -521.0                              | 72.9% |
| $\Delta E_{\text{disp}}$    | -20.4                               | 2.5%  | -17.7                               | 2.5%  |
|                             |                                     |       |                                     |       |
| $\Delta E_{\text{int}}$     | -314.4                              |       | -233.7                              |       |
|                             |                                     |       |                                     |       |
| $\Delta \rho_1$             | -92.0                               | 14.6% | -100.1                              | 19.2% |
| $\Delta \rho_2$             | -92.0                               | 14.6% | -76.8                               | 14.7% |
| $\Delta \rho_3$             | -102.1                              | 16.2% | -76.8                               | 14.7% |
| $\Delta \rho_4$             | -40.7                               | 6.5%  | -27.7                               | 5.3%  |
| $\Delta \rho_5$             | -34.2                               | 5.4%  | -27.7                               | 5.3%  |
| $\Delta \rho_6$             | -34.3                               | 5.4%  | -26.3                               | 5.1%  |

Table S3. Energy decomposition analysis (EDA) at the at the hybrid TZ2P/PBE0 level of theory for Pd/[Pd@E<sub>18</sub>]<sup>4-</sup> and Pd/[@E<sub>12</sub>]<sup>2-</sup> interaction, denoting the individual contribution from relevant deformation density channels. Values in kcal/mol.

|                                        | E=Ge   |       | E=Sn   |       |
|----------------------------------------|--------|-------|--------|-------|
| Pd/[Pd@E <sub>18</sub> ] <sup>4-</sup> |        |       |        |       |
| $\Delta E_{\text{Pauli}}$              | 328.3  |       | 257.4  |       |
| $\Delta E_{\text{elestat}}$            | -307.9 | 66.6% | -262.7 | 68.3% |
| $\Delta E_{\text{orb}}$                | -147.7 | 31.9% | -113.9 | 29.6% |
| $\Delta E_{\text{disp}}$               | -6.8   | 1.5%  | -8.2   | 2.1%  |
|                                        |        |       |        |       |
| $\Delta E_{\text{int}}$                | -134.2 |       | -127.4 |       |
|                                        |        |       |        |       |
| $\Delta \rho_1$                        | -31.7  | 21.5% | -23.9  | 21.0% |
| $\Delta \rho_2$                        | -31.7  | 21.5% | -23.9  | 21.0% |
| $\Delta \rho_3$                        | -23.4  | 15.9% | -12.0  | 10.5% |
| $\Delta \rho_4$                        | -18.0  | 12.2% | -14.0  | 12.3% |
| $\Delta \rho_5$                        | -18.0  | 12.2% | -12.7  | 11.1% |
| $\Delta \rho_6$                        | -7.2   | 4.9%  | -12.7  | 11.1% |
| Endo                                   |        |       |        |       |
| Pd/[E <sub>12</sub> ] <sup>2-</sup>    |        |       |        |       |
| $\Delta E_{\text{Pauli}}$              | 415.7  |       | 280.9  |       |
| $\Delta E_{\text{elestat}}$            | -369.8 | 68.1% | -277.1 | 67.5% |
| $\Delta E_{\text{orb}}$                | -169.0 | 31.1% | -127.2 | 31.0% |
| $\Delta E_{\text{disp}}$               | -4.3   | 0.8%  | -6.1   | 1.5%  |
|                                        |        |       |        |       |
| $\Delta E_{\text{int}}$                | -122.8 |       | -128.0 |       |
|                                        |        |       |        |       |
| $\Delta \rho_1$                        | -32.6  | 19.3% | -21.4  | 16.8% |
| $\Delta \rho_2$                        | -29.8  | 17.7% | -19.6  | 15.4% |
| $\Delta \rho_3$                        | -29.8  | 17.7% | -19.6  | 15.4% |
| $\Delta \rho_4$                        | -27.5  | 16.3% | -18.3  | 14.4% |
| $\Delta \rho_5$                        | -27.5  | 16.3% | -18.3  | 14.4% |
| $\Delta \rho_6$                        | -5.0   | 3.0%  | -15.0  | 11.8% |
